# Supplementary material
Source: PubMed Central journal article supplement (PMC4364031)
Supplement: NIHMS556461-supplement-02.pdf [file NIHMS556461-supplement-02.pdf]

**Table 1. Variables of the quantitative model**

| Variable | Description                                            |
|----------|--------------------------------------------------------|
| $x_1$    | [free AtRGS1]                                          |
| $x_2$    | [AtRGS1:G $\alpha^{\text{GDP}}$ $\beta\gamma$ complex] |
| $x_3$    | [AtRGS1:G $\alpha^{\text{GTP}}$ $\beta\gamma$ complex] |
| $x_4$    | [AtRGS1:G $\alpha^{\text{GDP}}$ complex]               |
| $x_5$    | [AtRGS1:G $\alpha^{\text{GTP}}$ complex]               |
| $x_6$    | [G $\alpha^{\text{GDP}}$ $\beta\gamma$ ]               |
| $x_7$    | [G $\alpha^{\text{GTP}}$ $\beta\gamma$ ]               |
| $x_8$    | [G $\alpha^{\text{GDP}}$ ]                             |
| $x_9$    | [G $\alpha^{\text{GTP}}$ ]                             |
| $x_{10}$ | [G $\beta\gamma$ ]                                     |
| $x_{11}$ | [Phosphorylated AtRGS1]                                |
| $x_{12}$ | [Internalized AtRGS1]                                  |
| $x_{13}$ | [Hypothetical D-glucose (co)receptor]                  |
| $x_{14}$ | [Kinase 2] (not present in the one-kinase model)       |
| $x_{15}$ | [Kinase 1]                                             |
| $L$      | [D-glucose]                                            |

**Table 2. Ordinary Differential Equations of the quantitative model**

$$\begin{aligned} \frac{dx_1}{dt} &= -k_{17} \cdot x_1 \cdot x_7 - k_{18} \cdot x_1 \cdot x_9 - k_{12} \cdot x_1 + k_{24} \cdot x_5 + k_{25} \cdot x_3 + k_{27} \cdot x_{12} \\ \frac{dx_2}{dt} &= k_4 \cdot x_3 + k_8 \cdot x_4 \cdot x_{10} - k_6 \cdot x_2 - k_{16} \cdot x_2 \\ \frac{dx_3}{dt} &= k_6 \cdot x_2 - k_4 \cdot x_3 - k_{11} \cdot x_3 \cdot \frac{x_{13}^{k_{14}}}{k_{26}^{k_{14}} + x_{13}^{k_{14}}} - k_{25} \cdot x_3 + k_{17} \cdot x_1 \cdot x_7 + k_{13} \cdot x_5 \cdot x_{10} \\ \frac{dx_4}{dt} &= k_4 \cdot x_5 - k_6 \cdot x_4 - k_8 \cdot x_4 \cdot x_{10} + k_{16} \cdot x_2 \\ \frac{dx_5}{dt} &= k_6 \cdot x_4 + k_{11} \cdot x_3 \cdot \frac{x_{13}^{k_{14}}}{k_{26}^{k_{14}} + x_{13}^{k_{14}}} - k_4 \cdot x_5 - k_3 \cdot x_5 \cdot (x_{14} + x_{15}) + k_{30} \cdot x_{11} + k_{18} \cdot x_1 \cdot x_9 - k_2 \cdot x_5 - k_{24} \cdot x_5 - k_{13} \cdot x_5 \cdot x_{10} \\ \frac{dx_6}{dt} &= k_5 \cdot x_7 + k_7 \cdot x_8 \cdot x_{10} - k_6 \cdot x_6 - k_{28} \cdot x_6 \\ \frac{dx_7}{dt} &= k_6 \cdot x_6 - k_5 \cdot x_7 - k_{10} \cdot x_7 - k_{17} \cdot x_1 \cdot x_7 + k_9 \cdot x_9 \cdot x_{10} + k_{25} \cdot x_3 \\ \frac{dx_8}{dt} &= k_5 \cdot x_9 + k_{28} \cdot x_6 - k_6 \cdot x_8 - k_7 \cdot x_8 \cdot x_{10} \\ \frac{dx_9}{dt} &= k_{20} \cdot x_{11} + k_6 \cdot x_8 + k_{10} \cdot x_7 - k_5 \cdot x_9 - k_{18} \cdot x_1 \cdot x_9 - k_9 \cdot x_9 \cdot x_{10} + k_2 \cdot x_5 + k_{24} \cdot x_5 \\ \frac{dx_{10}}{dt} &= k_{10} \cdot x_7 + k_{11} \cdot x_3 \cdot \frac{x_{13}^{k_{14}}}{k_{26}^{k_{14}} + x_{13}^{k_{14}}} - k_8 \cdot x_4 \cdot x_{10} - k_7 \cdot x_8 \cdot x_{10} - k_9 \cdot x_9 \cdot x_{10} + k_{28} \cdot x_6 - k_{13} \cdot x_5 \cdot x_{10} + k_{16} \cdot x_2 \\ \frac{dx_{11}}{dt} &= k_3 \cdot x_5 \cdot (x_{14} + x_{15}) - k_{20} \cdot x_{11} - k_{30} \cdot x_{11} \\ \frac{dx_{12}}{dt} &= k_2 \cdot x_5 + k_{12} \cdot x_1 + k_{20} \cdot x_{11} - k_{27} \cdot x_{12} \\ \frac{dx_{13}}{dt} &= k_{15} \cdot (L - x_{13}) \\ \frac{dx_{14}}{dt} &= \begin{cases} k_1 \cdot \left( \frac{k_{21} \cdot x_{10}^2}{k_{22}^2 + x_{10}^2} - x_{14} \right), & \text{two-kinase model} \\ 0, & \text{one-kinase model} \end{cases} \\ \frac{dx_{15}}{dt} &= k_{19} \cdot \left( \frac{k_{23} \cdot x_{10}^2}{k_{29}^2 + x_{10}^2} - x_{15} \right) \end{aligned}$$

**Table 3. Parameter set values used for the one-kinase model ( $Md_{1kinase}^{top50}$ ) and the two-kinase model ( $Md_{2kinase}^{top50}$ )**

| Parameter             | Description                                                                       | Values in one-kinase model ( $Md_{1kinase}^{top50}$ )    | Values in two-kinase model ( $Md_{2kinase}^{top50}$ )    | Source    |
|-----------------------|-----------------------------------------------------------------------------------|----------------------------------------------------------|----------------------------------------------------------|-----------|
| <b>k<sub>1</sub></b>  | Deactivation rate of kinase 2                                                     | --                                                       | $6.21 \times 10^{-4} \text{ min}^{-1}$                   | estimated |
| <b>k<sub>2</sub></b>  | Phosphorylation rate of AtRGS1                                                    | $2.50 \text{ min}^{-1}$                                  | $2.15 \text{ min}^{-1}$                                  | estimated |
| <b>k<sub>3</sub></b>  | Kinase-dependent AtRGS1 internalization rate                                      | $1.04 \times 10^{-2} \text{ molc}^{-1} \text{ min}^{-1}$ | $7.29 \times 10^{-3} \text{ molc}^{-1} \text{ min}^{-1}$ | estimated |
| <b>k<sub>4</sub></b>  | AtRGS1-dependent GTP hydrolysis rate                                              | $1.89 \text{ min}^{-1}$                                  | $1.89 \text{ min}^{-1}$                                  | [1]       |
| <b>k<sub>5</sub></b>  | Intrinsic GTP hydrolysis rate                                                     | $4.95 \times 10^{-2} \text{ min}^{-1}$                   | $4.95 \times 10^{-2} \text{ min}^{-1}$                   | [2]       |
| <b>k<sub>6</sub></b>  | Intrinsic nucleotide exchange rate                                                | $8.4 \text{ min}^{-1}$                                   | $8.4 \text{ min}^{-1}$                                   | [3]       |
| <b>k<sub>7</sub></b>  | Association rate of $G\alpha^{GDP}$ and $G\beta\gamma$                            | $3.50 \times 10^{-2} \text{ molc}^{-1} \text{ min}^{-1}$ | $3.50 \times 10^{-2} \text{ molc}^{-1} \text{ min}^{-1}$ | [4]       |
| <b>k<sub>8</sub></b>  | Dissociation rate of $\text{AtRGS1}:G\alpha^{GDP}\beta\gamma$                     | $1.09 \times 10^{-2} \text{ molc}^{-1} \text{ min}^{-1}$ | $4.91 \times 10^{-3} \text{ molc}^{-1} \text{ min}^{-1}$ | estimated |
| <b>k<sub>9</sub></b>  | Association rate of $G\alpha^{GTP}$ and $G\beta\gamma$                            | $1.01 \times 10^{-6} \text{ molc}^{-1} \text{ min}^{-1}$ | $4.26 \times 10^{-6} \text{ molc}^{-1} \text{ min}^{-1}$ | estimated |
| <b>k<sub>10</sub></b> | Dissociation rate of $G\alpha^{GTP}\beta\gamma$                                   | $4.53 \times 10^{-6} \text{ min}^{-1}$                   | $4.65 \times 10^{-5} \text{ min}^{-1}$                   | estimated |
| <b>k<sub>11</sub></b> | D-glucose-dependent dissociation rate of $\text{AtRGS1}:G\alpha^{GTP}\beta\gamma$ | $20.06 \text{ min}^{-1}$                                 | $29.38 \text{ min}^{-1}$                                 | estimated |
| <b>k<sub>12</sub></b> | Constitutive AtRGS1 internalization rate                                          | $6.04 \text{ min}^{-1}$                                  | $5.00 \text{ min}^{-1}$                                  | estimated |
| <b>k<sub>13</sub></b> | Association rate of $\text{AtRGS1}:G\alpha^{GTP}$ and $G\beta\gamma$              | $2.87 \times 10^{-4} \text{ molc}^{-1} \text{ min}^{-1}$ | $6.61 \times 10^{-4} \text{ molc}^{-1} \text{ min}^{-1}$ | estimated |
| <b>k<sub>14</sub></b> | Hill coefficient on hypothetical glucose (co)receptor X                           | 2                                                        | 2                                                        | estimated |
| <b>k<sub>15</sub></b> | Deactivation rate of the hypothetical glucose (co)receptor                        | $1.16 \times 10^{-1} \text{ min}^{-1}$                   | $2.31 \times 10^{-1} \text{ min}^{-1}$                   | estimated |
| <b>k<sub>16</sub></b> | Association rate of $\text{AtRGS1}:G\alpha^{GDP}$ and $G\beta\gamma$              | $1.60 \times 10^{-3} \text{ min}^{-1}$                   | $5.44 \times 10^{-3} \text{ min}^{-1}$                   | estimated |

|                       |                                                                |                                                            |                                                            |           |
|-----------------------|----------------------------------------------------------------|------------------------------------------------------------|------------------------------------------------------------|-----------|
| <b>k<sub>17</sub></b> | Association rate of $G\alpha^{GTP}\beta\gamma$ and free AtRGS1 | $2.52 \times 10^{-4}$<br>$\text{molc}^{-1}\text{min}^{-1}$ | $5.09 \times 10^{-4}$<br>$\text{molc}^{-1}\text{min}^{-1}$ | estimated |
| <b>k<sub>18</sub></b> | Association rate of $G\alpha^{GTP}$ and free AtRGS1            | $3.90 \times 10^{-2}$<br>$\text{molc}^{-1}\text{min}^{-1}$ | $3.21 \times 10^{-2}$<br>$\text{molc}^{-1}\text{min}^{-1}$ | estimated |
| <b>k<sub>19</sub></b> | Deactivation rate of Kinase 1                                  | $4.70 \times 10^{-3} \text{min}^{-1}$                      | $1.52 \times 10^{-2} \text{min}^{-1}$                      | estimated |
| <b>k<sub>20</sub></b> | Internalization rate of phosphorylated AtRGS1                  | $6.83 \times 10^1 \text{min}^{-1}$                         | $7.20 \times 10^1 \text{min}^{-1}$                         | estimated |
| <b>k<sub>21</sub></b> | $G\beta\gamma$ -dependent maximum activation of Kinase 2       | --                                                         | $5.53 \times 10^3 \text{molc}$                             | estimated |
| <b>k<sub>22</sub></b> | $K_m$ of kinase 2 activation                                   | --                                                         | $4.25 \times 10^3 \text{molc}$                             | estimated |
| <b>k<sub>23</sub></b> | $G\beta\gamma$ -dependent maximum activation of Kinase 1       | $9.84 \times 10^4 \text{molc}$                             | $5.57 \times 10^4 \text{molc}$                             | estimated |
| <b>k<sub>24</sub></b> | Dissociation rate of AtRGS1: $G\alpha^{GTP}$                   | $2.50 \times 10^{-3} \text{min}^{-1}$                      | $3.80 \times 10^{-3} \text{min}^{-1}$                      | estimated |
| <b>k<sub>25</sub></b> | Dissociation rate of AtRGS1: $G\alpha^{GTP}\beta\gamma$        | $4.20 \times 10^{-3} \text{min}^{-1}$                      | $3.04 \times 10^{-3} \text{min}^{-1}$                      | estimated |
| <b>k<sub>26</sub></b> | $K_m$ of the hypothetical glucose (co)receptor X               | 1.19 (a.u.)                                                | 1.92 (a.u.)                                                | estimated |
| <b>k<sub>27</sub></b> | Tonic recycling rate of AtRGS1                                 | $3.06 \times 10^{-1} \text{min}^{-1}$                      | $1.84 \times 10^{-1} \text{min}^{-1}$                      | estimated |
| <b>k<sub>28</sub></b> | Dissociation rate of $G\alpha^{GDP}\beta\gamma$                | $2.36 \text{min}^{-1}$                                     | $3.48 \text{min}^{-1}$                                     | estimated |
| <b>k<sub>29</sub></b> | $K_m$ of kinase 1 activation                                   | $6.52 \times 10^4 \text{molc}$                             | $4.66 \times 10^4 \text{molc}$                             | estimated |
| <b>k<sub>30</sub></b> | Dephosphorylation rate of AtRGS1                               | $3.84 \text{min}^{-1}$                                     | $2.41 \text{min}^{-1}$                                     | estimated |

1. Urano D, Phan N, Jones JC, Yang J, Huang J, et al. (2012) Endocytosis of the seven-transmembrane RGS1 protein activates G-protein-coupled signalling in Arabidopsis. *Nat Cell Biol*.
2. Jones JC, Temple BR, Jones AM, Dohlman HG (2011) Functional reconstitution of an atypical G protein heterotrimer and regulator of G protein signaling protein (RGS1) from Arabidopsis thaliana. *J Biol Chem* 286: 13143-13150.
3. Johnston CA, Taylor JP, Gao Y, Kimple AJ, Grigston JC, et al. (2007) GTPase acceleration as the rate-limiting step in Arabidopsis G protein-coupled sugar signaling. *Proc Natl Acad Sci U S A* 104: 17317-17322.
4. Yildirim N, Hao N, Dohlman HG, Elston TC (2004) Mathematical Modeling of RGS and G-Protein Regulation in Yeast. In: David PS, editor. *Methods in Enzymology*: Academic Press. pp. 383-398.
